# Supplementary material for: A fluorescent reporter for mapping cellular protein-protein interactions in time and space
Source: PubMed Central journal article supplement — Mol Syst Biol. 2013 Mar 19;9:647. doi: 10.1038/msb.2013.3 (PMC3619943; doi:10.1038/msb.2013.3), 2013-03-19
Supplement: msb20133-s1.pdf [file msb20133-s1.pdf]

## Supplementary Information for

### A fluorescent reporter for mapping cellular protein-protein interactions in time and space

#### Table of Content:

The Supplementary Information contains four figures, ten movies, two tables, and one reference.

|                                                                                                                                                                                                                                                                                        |   |
|----------------------------------------------------------------------------------------------------------------------------------------------------------------------------------------------------------------------------------------------------------------------------------------|---|
| <b>Supplementary Figures</b>                                                                                                                                                                                                                                                           | 3 |
| <b>Figure 1:</b>                                                                                                                                                                                                                                                                       | 3 |
| Provides additional information for Figure 2. It compares the interaction profiles of Net1CCG with its different N <sub>ub</sub> -labeled interactions partners and evaluates the statistical significance of their differences                                                        |   |
| <b>Figure 2:</b>                                                                                                                                                                                                                                                                       | 4 |
| Supports the information in Figure 4. It shows the interactions of Nup49p in the Spit-Ub growth assay, compares the interaction profiles of Nup49CCG with its different N <sub>ub</sub> -labeled interactions partners and evaluates the statistical significance of their differences |   |
| <b>Figure 3:</b>                                                                                                                                                                                                                                                                       | 5 |
| Supports the information in Figure 5. It compares the interaction profiles between Spa2CCG and N <sub>ub</sub> -Pea2p in different genetic backgrounds and provides additional controls.                                                                                               |   |
| <b>Figure 4:</b>                                                                                                                                                                                                                                                                       | 6 |
| Provides additional information to Figure 7. It compares the nuclear and cytosolic interaction profiles of Nap1CCG and evaluates the statistical significance of the difference.                                                                                                       |   |

|                                                                                                                |    |
|----------------------------------------------------------------------------------------------------------------|----|
| <b>Description of Supplementary Movies</b>                                                                     | 7  |
| <b>Supplementary Tables</b>                                                                                    | 9  |
| <b>Table 1:</b>                                                                                                | 9  |
| Table S1 lists the constructs used in this study. It supports the information in the Materials and methods.    |    |
| <b>Table 2:</b>                                                                                                | 10 |
| Table S2 lists the yeast strains used in this study. It supports the information in the Materials and methods. |    |
| <b>Supplementary References</b>                                                                                | 12 |

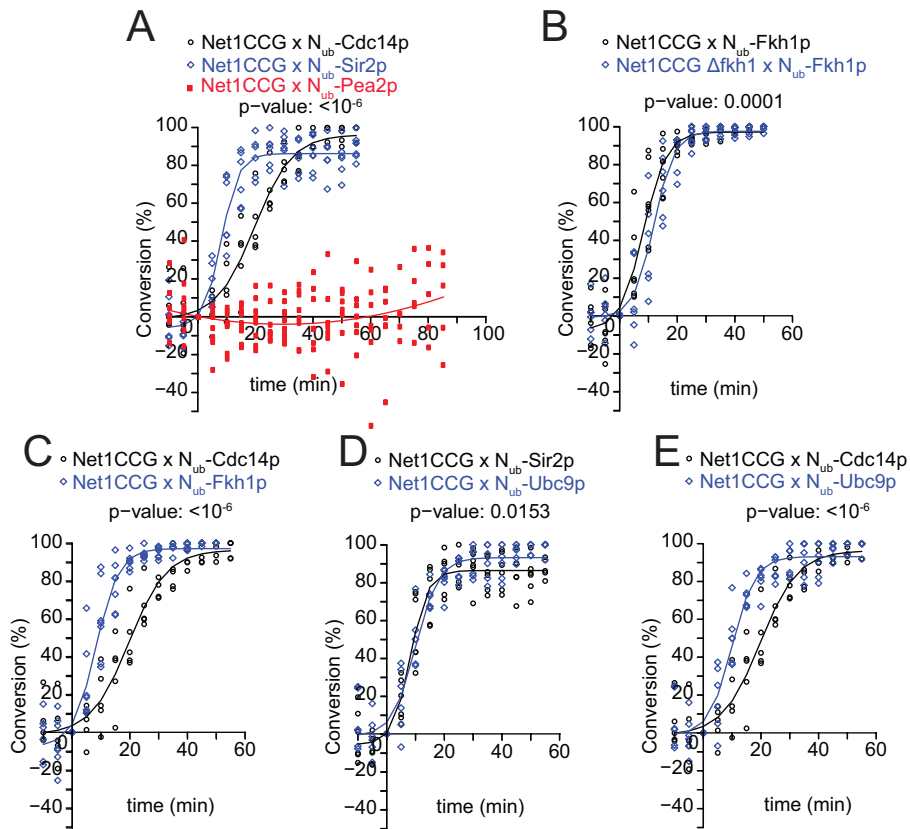

### Supplementary Figure 1

Interactions of Net1p. Related to Figure 2.

Shown are the pairwise comparisons of the time dependent conversion of Net1CCG by different N<sub>ub</sub>-fusion proteins. Lines show best fits for each interaction profile selected via the Akaike Information Criterion after fitting multiple models. P-values are calculated from the F-test. Net1CCG was expressed in diploid cells derived from either wildtype a-cells (a, c, d, e) or a-cells lacking *FKH1* (b, blue symbol and line).

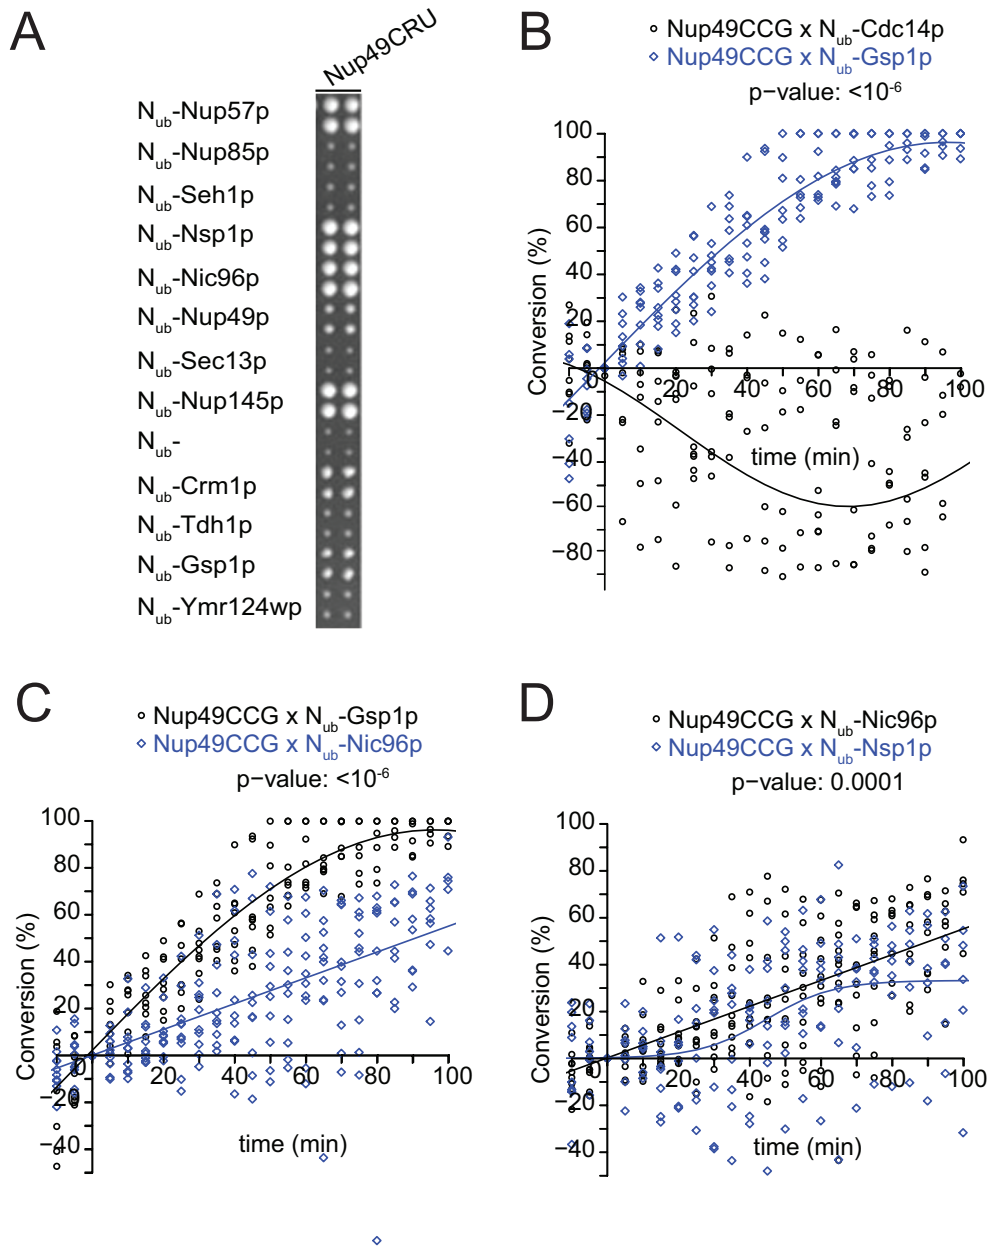

### Supplementary Figure 2

Split-Ubiquitin analysis of interactions at the nuclear pore. Related to Figure 4. (a) Split-Ubiquitin growth assay of diploid cells expressing Nup49CRU together with  $N_{ub}$ -fusions of other members of the nuclear pore, of members of the nucleo-cytoplasmic traffic, and with  $N_{ub}$ -fusions of unrelated proteins. Shown are the quadruplets of four independent matings each on selective medium containing 5-FOA. (b-d) Pairwise comparisons of the time dependent conversion of Nup49CCG by different  $N_{ub}$ -fusion proteins. Lines show best fits for each interaction profile selected via the Akaike Information Criterion after fitting multiple models. P-values are calculated from the F-test.

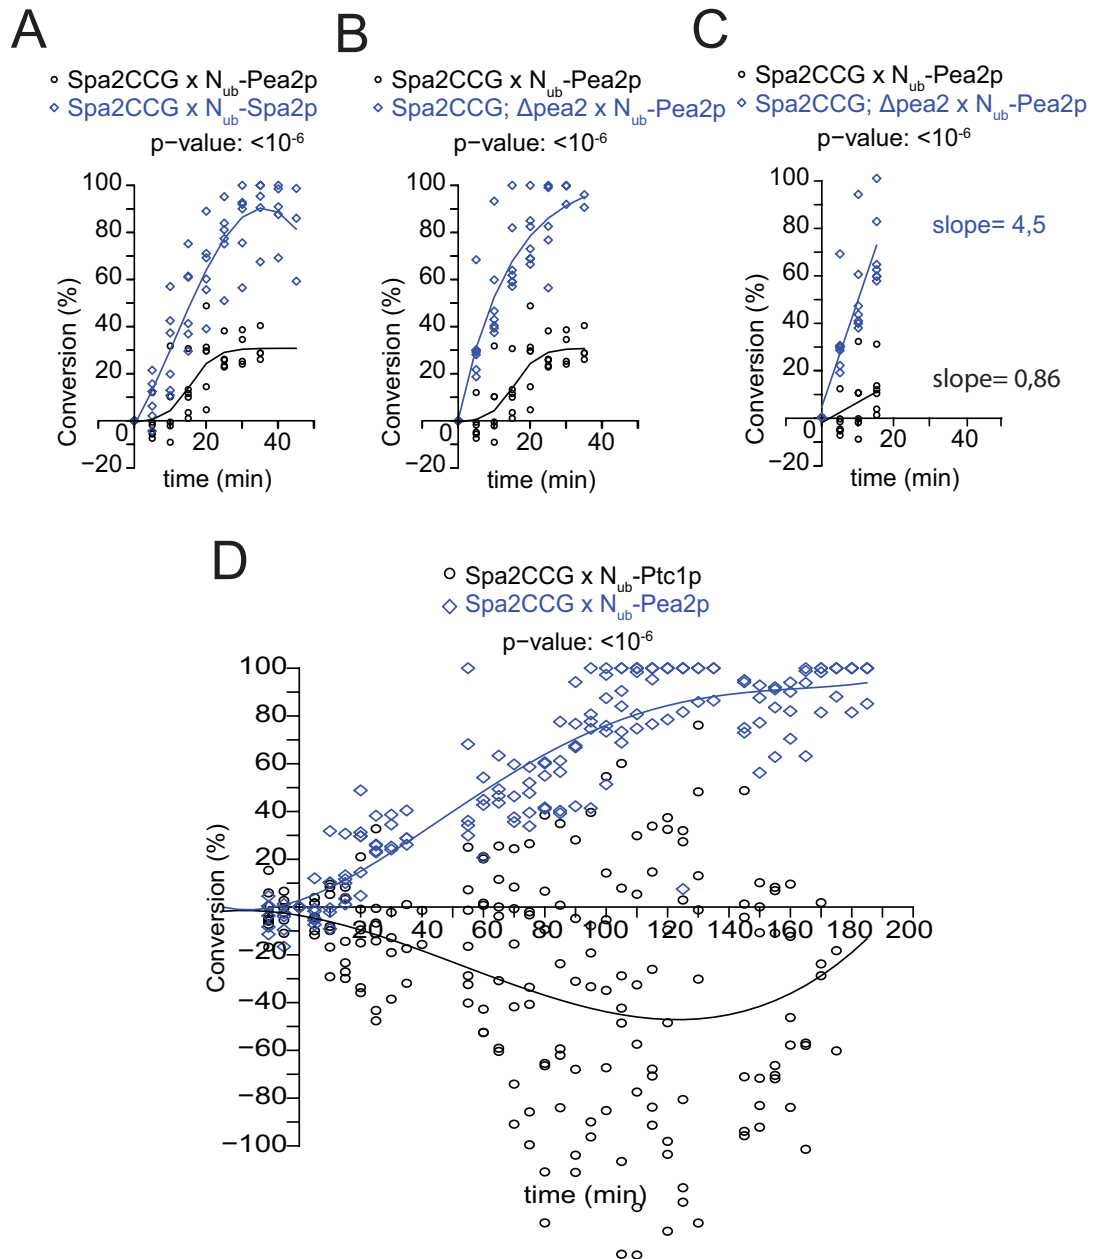

### Supplementary Figure 3

Intactions at the polar cortical domain. Related to Figure 5.

Shown are the pairwise comparisons of the time dependent conversion of Spa2CCG by  $N_{ub}$ -Pea2p (a, b) and  $N_{ub}$ -Ptc1p (d). Lines show best fits for each interaction profile selected via the Akaike Information Criterion after fitting multiple models. P-values are calculated from the F-test. Spa2CCG was expressed in diploid cells derived from either wildtype a-cells (a, d,) or a-cells lacking *PEA2* (b, blue symbol and line). (c) Linear regression lines and slopes for the first 15 min of Spa2CCG conversion induced by  $N_{ub}$ -Pea2p in the presence (black symbol and line) and absence of native *PEA2* (blue symbol and line)

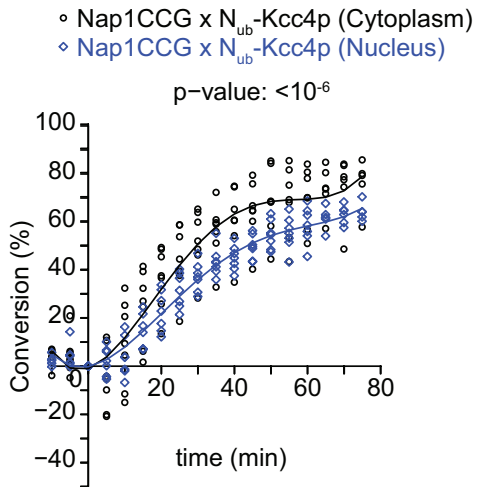

#### Supplementary Figure 4

Interactions of Nap1 in the nucleus and the cytoplasm. Related to Figure 7. Shown is the pairwise comparison of the time dependent conversion of Nap1CCG by  $N_{ub}$ -Kcc4p in the cytoplasm (black symbol and line) and the nucleus (blue symbol and line) of the mated diploids. Lines show best fits for each interaction profile selected via the Akaike Information Criterion after fitting multiple models. P-values are calculated from the F-test.

## **Description of Supplementary Movies**

### **Supplementary Movie 1**

Time lapse analysis of the mating of two yeast cells expressing Net1CCG and N<sub>ub</sub>-Sir2p. Related to Figure 2. Shown is the merge of Cherry- and GFP-fluorescence. Time 0 indicates the time point of highest fluorescence intensity at the beginning of cell fusion. Scale bar, 5 μm.

### **Supplementary Movie 2**

Time lapse analysis of the mating of two yeast cells expressing Net1CCG and N<sub>ub</sub>-Cdc14p respectively. Related to Figure 3. Shown is the merge of Cherry- and GFP-fluorescence. Time 0 indicates the time point of highest fluorescence intensity at the beginning of cell fusion. Scale bar, 5 μm.

### **Supplementary Movie 3**

Time lapse analysis of the mating of two yeast cells expressing Nup49CCG and N<sub>ub</sub>-Gsp1p. Related to Figure 4. Shown is the merge of Cherry- and GFP-fluorescence. Time 0 indicates the time point shortly before fusion of the nuclei. Scale bar, 5 μm. N<sub>ub</sub>-Gsp1p expression was induced by 100 μM copper.

### **Supplementary Movie 4**

Time lapse analysis of the mating of two yeast cells expressing Nup49CCG and N<sub>ub</sub>-Nsp1p respectively. Related to Figure 4. Shown is the merge of Cherry- and GFP-fluorescence. Time 0 indicates the time point shortly before fusion of the nuclei. Scale bar, 5 μm. N<sub>ub</sub>-Nsp1p expression was induced by 100 μM copper

### **Supplementary Movie 5**

Time lapse analysis of the mating of two yeast cells expressing Spa2CCG and N<sub>ub</sub>-Pea2p. Related to Figure 5. Shown is the merge of Cherry- and GFP-fluorescence. Time 0 indicates the time point of highest fluorescence intensity at the beginning of cell fusion. Scale bar, 5 μm.

### **Supplementary Movie 6**

Time lapse analysis of the mating of two yeast cells expressing Spa2CCG and N<sub>ub</sub>-Spa2p respectively. Related to Figure 5. Shown is the merge of Cherry- and GFP-fluorescence. Time 0 indicates the time point of highest fluorescence intensity at the beginning of cell fusion. Scale bar, 5 μm.

### **Supplementary Movie 7**

Time lapse analysis of the mating of two yeast cells expressing Spa2CCG and N<sub>ub</sub>-Pea2p. Related to Figure 5. The Spa2CCG expressing strain lacks *PEA2*. Shown is the merge of Cherry- and GFP-fluorescence. Time 0 indicates the time point of highest fluorescence intensity at the beginning of cell fusion. Scale bar, 5 μm.

### **Supplementary Movie 8**

Time lapse analysis of the mating of two yeast cells expressing Spa2CCG and N<sub>ub</sub>-Hof1p. Related to Figure 5. Time 0 indicates the time point of highest fluorescence intensity at the beginning of cell fusion. Scale bar, 5 μm.

### **Supplementary Movie 9**

Time lapse analysis of the mating of two yeast cells expressing Nap1CCG and N<sub>ub</sub>-Kcc4p. Related to Figure 6. Shown is the merge of Cherry- and GFP-fluorescence. Time 0 indicates the time point shortly before cell fusion. Scale bar, 5 μm. N<sub>ub</sub>-Kcc4p expression was induced by 100 μM copper. Images were deconvoluted before preparation of the movie.

### **Supplementary Movie 10**

Time lapse analysis of the mating of two yeast cells expressing Stu2CCG and N<sub>ub</sub>-Kar9p. Related to Figure 8. Shown is the merge of Cherry- and GFP-fluorescence. Time 0 indicates the time point when the two SPBs align to each other. Scale bar, 5 μm.



## Supplementary Table 1

List of constructs used and created in this study

| Name                                           | Description                      | Source     |
|------------------------------------------------|----------------------------------|------------|
| <i>NET1-C<sub>Ub</sub>-RURA3 pRS303</i>        | <i>lacZ Amp<sup>r</sup> HIS3</i> | This study |
| <i>NUP49-C<sub>Ub</sub>-RURA3 pRS303</i>       | <i>lacZ Amp<sup>r</sup> HIS3</i> | This study |
| <i>SPA2C<sub>Ub</sub>-RURA3 pRS303</i>         | <i>lacZ Amp<sup>r</sup> HIS3</i> | This study |
| <i>STU2-C<sub>Ub</sub>-RURA3 pRS303</i>        | <i>lacZ Amp<sup>r</sup> HIS3</i> | This study |
| <i>NET1-Cherry-C<sub>Ub</sub>-RGFP pRS306</i>  | <i>lacZ Amp<sup>r</sup> URA3</i> | This study |
| <i>NUP49-Cherry-C<sub>Ub</sub>-RGFP pRS306</i> | <i>lacZ Amp<sup>r</sup> URA3</i> | This study |
| <i>SPA2-Cherry-C<sub>Ub</sub>-RGFP pRS306</i>  | <i>lacZ Amp<sup>r</sup> URA3</i> | This study |
| <i>KEL1-Cherry-C<sub>Ub</sub>-RGFP pRS306</i>  | <i>lacZ Amp<sup>r</sup> URA3</i> | This study |
| <i>NAP1-Cherry-C<sub>Ub</sub>-RGFP pRS306</i>  | <i>lacZ Amp<sup>r</sup> URA3</i> | This study |
| <i>STU2-Cherry-C<sub>Ub</sub>-RGFP pRS306</i>  | <i>lacZ Amp<sup>r</sup> URA3</i> | This study |

## Supplementary Table 2

List of yeast strains used and created in this study

| Strain   | Name                   | Genotype                                                                                                      | Source              |
|----------|------------------------|---------------------------------------------------------------------------------------------------------------|---------------------|
| JD53     | JD53                   | <i>Mata ura3-52 leu2-3,112 his3-Δ200 lys2-801 trp1-Δ63</i>                                                    | Dohmen et al., 1995 |
| JD47-13c | JD47-13c               | <i>Mata ura3-52 leu2-3,112 his3-Δ200 lys2-801 trp1-Δ63</i>                                                    | Dohmen et al., 1995 |
| JD51     | JD51                   | <i>Mata/α ura3-52/ura3-53 leu2-3,112/ leu2-3,112 his3-Δ200/ his3-Δ200 lys2-801/lys2-801 trp1-Δ63/trp1-Δ63</i> | Dohmen et al., 1995 |
| YAD196   | Net1CRU                | JD47-13c, <i>NET1::NET1-C<sub>UB</sub>-RURA3 pRS303</i>                                                       | This study          |
| YAD552   | Nup49CRU               | JD47-13c, <i>NUP49::NUP49-C<sub>UB</sub>-RURA3 pRS303</i>                                                     | This study          |
| UNY97    | Spa2CRU                | JD47-13c, <i>SPA2::SPA2-C<sub>UB</sub>-RURA3 pRS303</i>                                                       | This study          |
| STY225   | Stu2CRU                | JD47-13c, <i>STU2::STU2-C<sub>UB</sub>-RURA3 pRS303</i>                                                       | This study          |
| YAD491   | Net1CCG                | JD47-13c, <i>NET1::NET1-CHERRY-C<sub>UB</sub>-RGFP pRS306</i>                                                 | This study          |
| YAD492   | Nup49CCG               | JD47-13c, <i>NUP49::NUP49-CHERRY-C<sub>UB</sub>-RGFP pRS306</i>                                               | This study          |
| YAD424   | Spa2CCG                | JD47-13c, <i>SPA2::SPA2-CHERRY-C<sub>UB</sub>-RGFP pRS306</i>                                                 | This study          |
| STY332   | Kel1CCG                | JD47-13c, <i>KEL1::KEL1-CHERRY-C<sub>UB</sub>-RGFP pRS306</i>                                                 | This study          |
| MZY115   | Nap1CCG                | JD47-13c, <i>NAP1::NAP1-CHERRY-C<sub>UB</sub>-RGFP pRS306</i>                                                 | This study          |
| STY359   | Stu2CCG                | JD47-13c, <i>STU2::STU2-CHERRY-C<sub>UB</sub>-RGFP pRS306</i>                                                 | This study          |
| YAD662   | Net1CCG Δfkh1          | JD47-13c, <i>NET1::NET1-CHERRY-C<sub>UB</sub>-RGFP pRS306, FKH1::hphNT1Δfkh1</i>                              | This study          |
| YAD670   | Spa2CCG Δpea2          | JD47-13c, <i>SPA2::SPA2-CHERRY-C<sub>UB</sub>-RGFP pRS306, PEA2::hphNT1Δpea2</i>                              | This study          |
| YAD663   | Spa2CCG Δhof1          | JD47-13c, <i>SPA2::SPA2-CHERRY-C<sub>UB</sub>-RGFP pRS306, HOF1::natNΔhof1</i>                                | This study          |
| YAD671   | Spa2CCG Δymr124w       | JD47-13c, <i>SPA2::SPA2-CHERRY-C<sub>UB</sub>-RGFP pRS306, YMR124w::hphNT1Δymr124w</i>                        | This study          |
| Nub85    | N <sub>ub</sub> -Sir2  | JD53, <i>P<sub>SIR2</sub>::kanMX6 P<sub>CUP1</sub>N<sub>ub</sub>-HA</i>                                       | This study          |
| SHY159   | N <sub>ub</sub> -Ubc9  | JD53, <i>P<sub>UBC9</sub>::kanMX6 P<sub>CUP1</sub>N<sub>ub</sub>-HA</i>                                       | Hruby et al., 2011  |
| SHY31    | N <sub>ub</sub> -Cdc14 | JD53, <i>P<sub>CDC14</sub>::kanMX6 P<sub>CUP1</sub>N<sub>ub</sub>-HA</i>                                      | Hruby et al., 2011  |
| SHY70    | N <sub>ub</sub> -Fkh1  | JD53, <i>P<sub>FKH1</sub>::kanMX6 P<sub>CUP1</sub>N<sub>ub</sub>-HA</i>                                       | Hruby et al., 2011  |
| SHY86    | N <sub>ub</sub> -Tdh1  | JD53, <i>P<sub>TDH1</sub>::kanMX6 P<sub>CUP1</sub>N<sub>ub</sub>-HA</i>                                       | Hruby et al., 2011  |
| Nub99    | N <sub>ub</sub> -Nup57 | JD53, <i>P<sub>NUP57</sub>::kanMX6 P<sub>CUP1</sub>N<sub>ub</sub>-HA</i>                                      | This study          |
| Nub103   | N <sub>ub</sub> -Nic96 | JD53, <i>P<sub>NIC96</sub>::kanMX6 P<sub>CUP1</sub>N<sub>ub</sub>-HA</i>                                      | This study          |
| Nub102   | N <sub>ub</sub> -Nsp1  | JD53, <i>P<sub>NSP1</sub>::kanMX6 P<sub>CUP1</sub>N<sub>ub</sub>-HA</i>                                       | This study          |
| Nub107   | N <sub>ub</sub> -Gsp1  | JD53, <i>P<sub>GSP1</sub>::kanMX6 P<sub>CUP1</sub>N<sub>ub</sub>-HA</i>                                       | This study          |
| SHY156   | N <sub>ub</sub> -Spa2  | JD53, <i>P<sub>SPA2</sub>::kanMX6 P<sub>CUP1</sub>N<sub>ub</sub>-HA</i>                                       | Hruby et al., 2011  |
| Nub69    | N <sub>ub</sub> -Pea2  | JD53, <i>P<sub>PEA2</sub>::kanMX6 P<sub>CUP1</sub>N<sub>ub</sub>-HA</i>                                       | Hruby et al., 2011  |

|        |                                         |                                                                                                   |                            |
|--------|-----------------------------------------|---------------------------------------------------------------------------------------------------|----------------------------|
| SHY178 | N <sub>ub</sub> -Ptc1                   | JD53, <i>P<sub>PTC1</sub>::kanMX6 P<sub>CUP1</sub>N<sub>ub</sub>-HA</i>                           | Hruby <i>et al.</i> , 2011 |
| SHY248 | N <sub>ub</sub> -Hof1                   | JD53, <i>P<sub>HOF1</sub>::kanMX6 P<sub>CUP1</sub>N<sub>ub</sub>-HA</i>                           | Hruby <i>et al.</i> , 2011 |
| KLY122 | N <sub>ub</sub> -Hof1 <sub>98-609</sub> | JD53, <i>HOF1<sub>1-100</sub>::kanMX6 P<sub>CUP1</sub>N<sub>ub</sub>-HA</i>                       | Hruby <i>et al.</i> , 2011 |
| SHY106 | N <sub>ub</sub> -YMR124w                | JD53, <i>P<sub>YMR124w</sub>::kanMX6 P<sub>CUP1</sub>N<sub>ub</sub>-HA</i>                        | Hruby <i>et al.</i> , 2011 |
| SHY216 | N <sub>ub</sub> -Kel1                   | JD53, <i>P<sub>KEL1</sub>::kanMX6 P<sub>CUP1</sub>N<sub>ub</sub>-HA</i>                           | Hruby <i>et al.</i> , 2011 |
| SHY207 | N <sub>ub</sub> -Kcc4                   | JD53, <i>P<sub>KCC4</sub>::kanMX6 P<sub>CUP1</sub>N<sub>ub</sub>-HA</i>                           | Hruby <i>et al.</i> , 2011 |
| SHY198 | N <sub>ub</sub> -Kar9                   | JD53, <i>P<sub>KAR9</sub>::kanMX6 P<sub>CUP1</sub>N<sub>ub</sub>-HA</i>                           | Hruby <i>et al.</i> , 2011 |
| TAY8   | N <sub>ub</sub> -Spc72                  | JD53, <i>P<sub>SPC72</sub>::kanMX6 P<sub>CUP1</sub>N<sub>ub</sub>-HA</i>                          | Hruby <i>et al.</i> , 2011 |
| YAD305 | N <sub>ub</sub> -Spa2 Δ <i>pea2</i>     | JD53, <i>P<sub>SPA2</sub>::kanMX6 P<sub>CUP1</sub>N<sub>ub</sub>-HA, PEA2::CmLEU2Δ<i>pea2</i></i> | This study                 |
| YAD688 | P <sub>CUP1</sub> GFP-Cdc14             | JD53, <i>P<sub>CDC14</sub>::kanMX6P<sub>CUP1</sub>GFP</i>                                         | This study                 |

### **Supplementary References**

Dohmen, R. J., Stappen, R., McGrath, J. P., Forrova, H., Kolarov, J., Goffeau, A., Varshavsky, A. (1995). An essential gene encoding a homolog of ubiquitin-activating enzyme. *J. Biol. Chem.* **270**: 18099-18109.
